# Supplementary material for: Comparative Study of the Tempering Behavior of Different Martensitic Steels by Means of In-Situ Diffractometry and Dilatometry
Source: PubMed Central journal article supplement (PMC7696766; doi:10.3390/ma13225058), 2020-11-10
Supplement: materials-13-05058-s001.pdf [file materials-13-05058-s001.pdf]

Supplementary Materials

# Comparative Study of the Tempering Behavior of Different Martensitic Steels by Means of In-Situ Diffractometry and Dilatometry

Martin Hunkel <sup>1,\*</sup>, Juan Dong <sup>1</sup>, Jeremy Epp <sup>1,2</sup>, Daniel Kaiser <sup>3</sup>, Stefan Dietrich <sup>3</sup>, Volker Schulze <sup>3</sup>, Ali Rajaei <sup>4</sup>, Bengt Hallstedt <sup>4</sup> and Christoph Broeckmann <sup>4</sup>

<sup>1</sup> Leibniz Institut für Werkstofforientierte Technologien–IWT, Badgasteiner Straße 3, 28359 Bremen, Germany; dong@iwt-bremen.de (J.D.); epp@iwt-bremen.de (J.E.)

<sup>2</sup> MAPEX Center for Materials and Processes, University of Bremen, Bibliothekstraße 1, 28359 Bremen, Germany

<sup>3</sup> Institut für angewandte Materialien - Werkstoffkunde, Karlsruher Institut für Technologie, Engelbert-Arnold-Str. 4, 76131 Karlsruhe, Germany; Daniel.Kaiser@dillinger.biz (D.K.); stefan.dietrich@kit.edu (S.D.); volker.schulze@kit.edu (V.S.)

<sup>4</sup> Institut für Werkstoffanwendungen im Maschinenbau, RWTH Aachen University, Augustinerbach 4, 52062 Aachen, Germany; a.rajaei@iwm.rwth-aachen.de (A.R.); b.hallstedt@iwm.rwth-aachen.de (B.H.); c.broeckmann@iwm.rwth-aachen.de (C.B.)

\* Correspondence: hunkel@iwt-bremen.de

## 1. Diffraction Patterns

### 1.1. The Diffraction Patterns for SAE 52100 Is Shown in the Main Text

Exemplarily, the diffraction patterns for 20 °C, 300 °C, and 500 °C are shown in Figure S1. At 20 °C mainly martensite and a small amount of 5 ma.% austenite could be detected. The austenite peak vanished at 300 °C. At 500 °C, a peak of about 3 ma.% cementite occurred. Thermal expansion shifted the martensite peaks to smaller angles. To further elucidate the effects from the dilatometric measurements, they are compared to the results from the in-situ XRD tempering experiments, where lattice parameters of martensite, its tetragonality and the phase contents of cementite, martensite and retained austenite were evaluated.

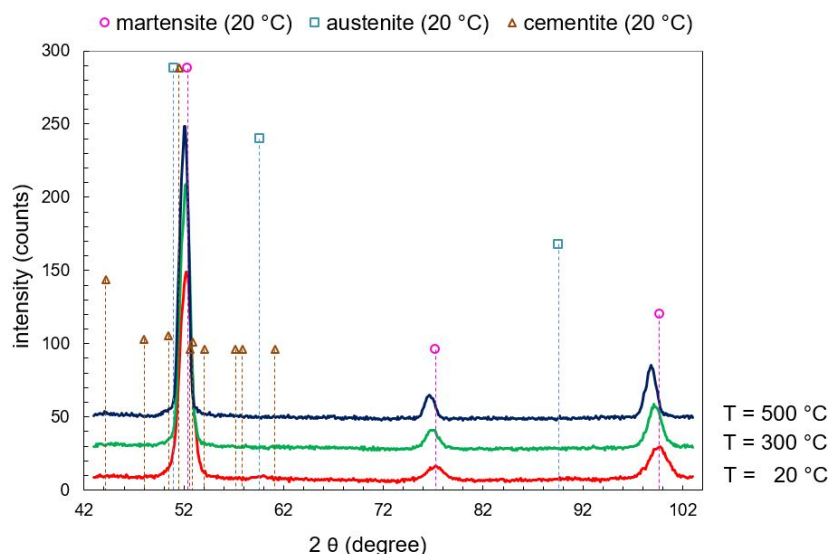

**Figure S1.** Diffraction patterns at 20 °C, 300 °C, and 500 °C from in-situ X-ray diffraction for SAE 4140.

The diffraction patterns for 20 °C, 300 °C, and 500 °C are shown in Figure S2. At each temperature, mainly martensite and a small amount of 5 ma.% austenite could be detected. Thermal expansion shifted the martensite peaks smaller angles.

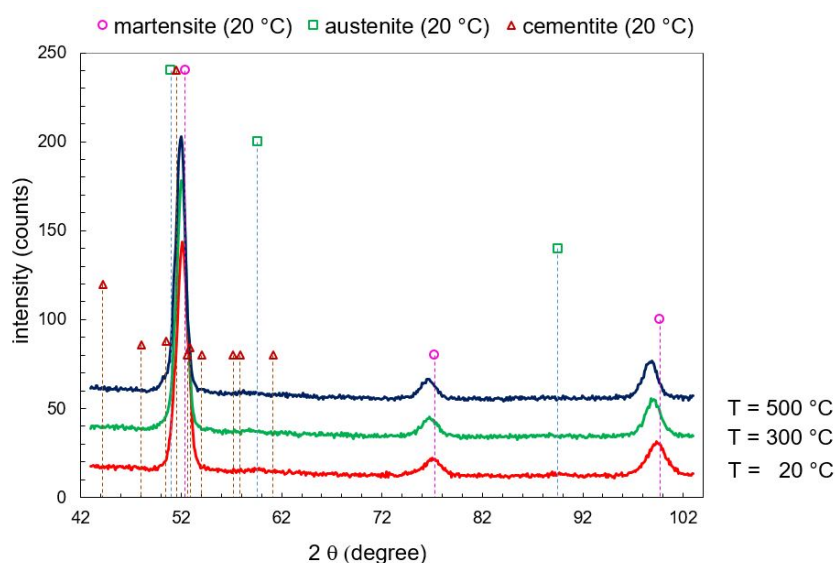

**Figure S2.** Diffraction patterns at 20 °C, 300 °C, and 500 °C from in-situ X-ray diffraction for SAE H13.

### 1.2. Metallography

The microstructure of as-quenched SAE 4140 consists of full martensite, see Figure S3a. Partially, some martensite laths can be identified. Figure S3b shows micrographs of the quenched and tempered microstructure.

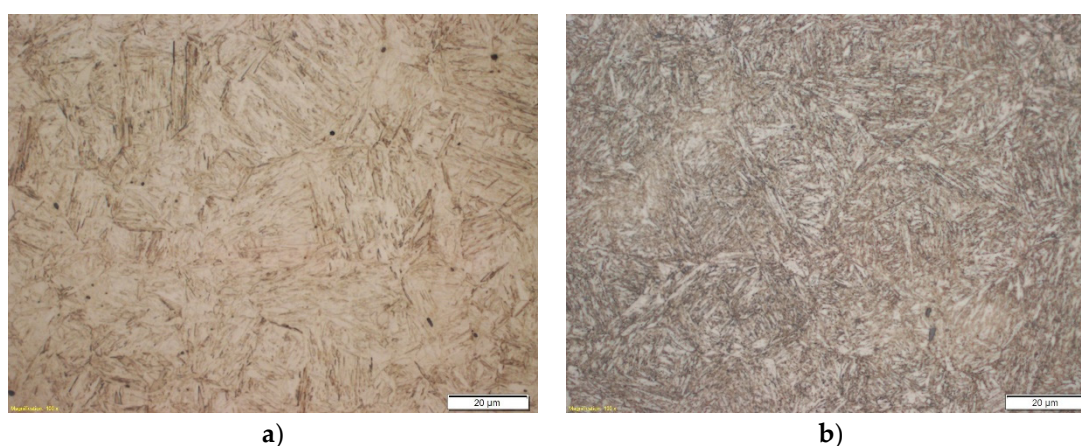

**Figure S3.** Micrographs of SAE 4140: **a)** as quenched, **b)** quenched and tempered up to 600 °C.

Figure S4a shows the micrograph of as quenched SAE 52100 (etchant: Nital). For the austenitizing condition applied, a significant amount of cementite is undissolved. This undissolved cementite can be identified by white-etched, spherical precipitations. Further, brown etched martensite plates and brighter austenite can be identified. Quenched and tempered SAE 52100 is shown in Figure S4b. The microstructure consists of a typical high annealed microstructure of SAE 52100.

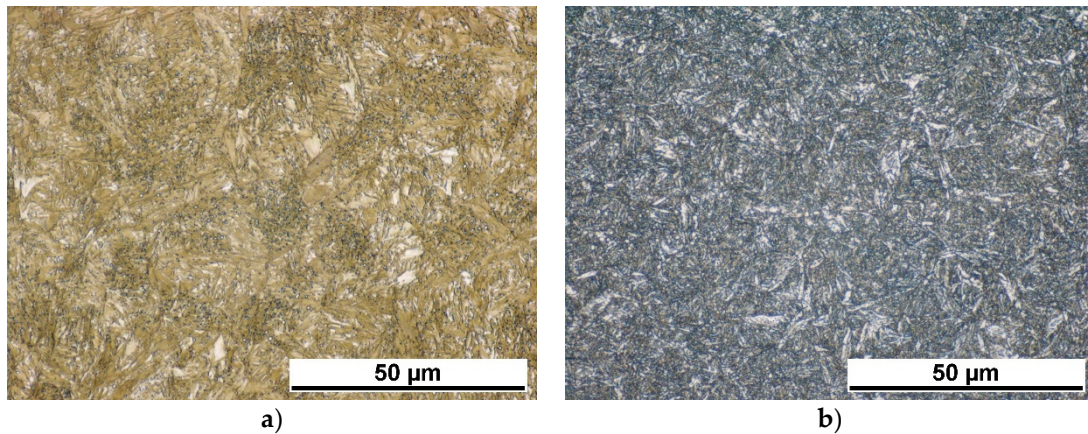

**Figure S4.** Micrographs of SAE 52100: **a)** as quenched, **b)** quenched and tempered up to 500 °C.

An SEM micrograph of as-quenched SAE H13 is shown in Figure S5a. The microstructure is a typical martensite with some undissolved, spherical carbides. Figure S5b shows the quenched and tempered state. The secondary electron images (SE) were acquired by using a Helios Nanolab DualBeam microscope of type G3 CX with an accelerating voltage of 5 kV and a beam current of 0.17 nA.

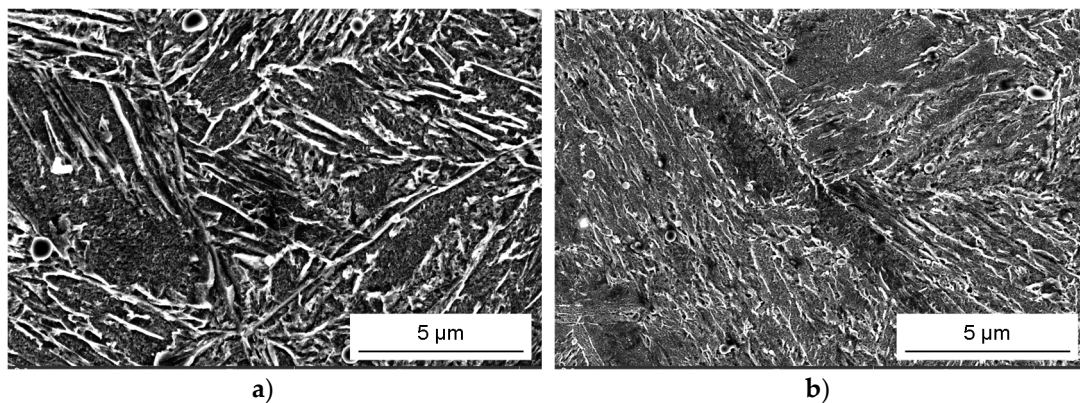

**Figure S5.** SEM micrographs of SAE H13: **a)** as quenched, **b)** quenched and tempered up to 650 °C.

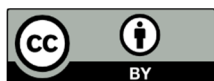

© 2020 by the authors. Submitted for possible open access publication under the terms and conditions of the Creative Commons Attribution (CC BY) license (<http://creativecommons.org/licenses/by/4.0/>).
